# Supplementary material
Source: PubMed Central journal article supplement (PMC4915554)
Supplement: DC152327SupplementaryData.pdf [file DC152327SupplementaryData.pdf]

SUPPLEMENTARY DATA

**Should Restrictions Be Relaxed for Metformin Use in Chronic Kidney  
Disease?**

**Subtitle:**

**“We Should Never Again Compromise Safety”**

**Author:**

**Kamyar Kalantar-Zadeh, MD, MPH, PhD<sup>1,2,3</sup>  
Csaba P. Kovesdy, MD<sup>4,5</sup>**

SUPPLEMENTARY DATA

**Supplementary Table A.** Estimated glomerular filtration rate (eGFR) based on the MDRD equation using serum creatinine of 1.5 mg/dL for men and 1.4 mg/dL for women in African Americans (AA) and other races (non-AA)

| Age (years) | AA   | non-AA | AA     | non-AA |
|-------------|------|--------|--------|--------|
|             | Male | Male   | Female | Female |
| 20          | 69   | 60     | 58     | 48     |
| 30          | 64   | 55     | 54     | 44     |
| 40          | 60   | 52     | 50     | 42     |
| 50          | 57   | 50     | 48     | 40     |
| 60          | 55   | 48     | 46     | 38     |
| 70          | 54   | 46     | 45     | 37     |
| 80          | 52   | 45     | 44     | 36     |

Footnote: The MDRD equation used in this table is the following:

$$\text{GFR (mL/min/1.73 m}^2\text{)} = 175 \times (S_{\text{cr}})^{-1.154} \times (\text{Age})^{-0.203} \times (0.742 \text{ if female}) \times (1.212 \text{ if African American})$$
